# Supplementary material for: Interaction between <em>M. tuberculosis</em> Lineage and Human Genetic Variants Reveals Novel Pathway Associations With Severity of TB
Source: Preprints.org preprint supplement (doi:10.20944/preprints202110.0045.v1), 2021-10-04
Supplement: Supplementary file 3 [file Supplmental Table 1.xlsx]

## Sheet: Aim2 eQTLs
CHR:BP:Allele	Database	Tissue	Effect Allele	P (eQTL Effect)	Signed Z	FDR	Gene Symbol
17:73318398:A:G	eQTLGen	eQTLGen_cis_eQTLs	A	7.7544e-262	-34.5676	0	MIF4GD
17:73394449:A:C	eQTLGen	eQTLGen_cis_eQTLs	A	5.6429e-217	-31.4405	0	MIF4GD
17:73397985:C:G	eQTLGen	eQTLGen_cis_eQTLs	C	8.1187e-211	-30.9866	0	MIF4GD
17:73318398:A:G	eQTLGen	eQTLGen_cis_eQTLs	A	7.4991e-121	23.3761	0	NUP85
16:77383780:C:T	eQTLGen	eQTLGen_cis_eQTLs	T	2.1805e-100	21.2695	0	MON1B
17:73394449:A:C	eQTLGen	eQTLGen_cis_eQTLs	A	7.9873e-99	-21.0996	0	MRPS7
17:73397985:C:G	eQTLGen	eQTLGen_cis_eQTLs	C	4.7082e-95	-20.685	0	MRPS7
17:73318398:A:G	BIOSQTL	BIOS_eQTL_geneLevel	A	9.56978e-77	-18.5413	0	MIF4GD
17:73318398:A:G	BIOSQTL	BIOS_eQTL_geneLevel	A	9.56978e-77	-18.5413	0	MRPS7
17:73318398:A:G	eQTLGen	eQTLGen_cis_eQTLs	A	1.538e-71	-17.8851	0	GRB2
17:73318398:A:G	BIOSQTL	BIOS_eQTL_geneLevel	A	1.53254e-54	-15.5523	0	GGA3
17:73318398:A:G	BIOSQTL	BIOS_eQTL_geneLevel	A	1.53254e-54	-15.5523	0	MRPS7
17:73318398:A:G	BIOSQTL	BIOS_eQTL_geneLevel	A	1.00351e-53	15.4317	0	NUP85
17:73394449:A:C	eQTLGen	eQTLGen_cis_eQTLs	A	2.4433e-52	15.2242	0	MYO15B
17:73397985:C:G	eQTLGen	eQTLGen_cis_eQTLs	C	2.6375e-51	15.0678	0	MYO15B
3:148619099:A:G	eQTLGen	eQTLGen_cis_eQTLs	A	8.9544e-46	14.2016	0	CPA3
3:148619595:C:T	eQTLGen	eQTLGen_cis_eQTLs	C	1.0123e-45	14.193	0	CPA3
3:148621041:A:C	eQTLGen	eQTLGen_cis_eQTLs	A	1.3617e-45	14.1722	0	CPA3
3:148621388:C:T	eQTLGen	eQTLGen_cis_eQTLs	C	1.5835e-45	14.1616	0	CPA3
3:148618975:G:T	eQTLGen	eQTLGen_cis_eQTLs	G	2.0571e-45	14.1434	0	CPA3
3:148621162:A:T	eQTLGen	eQTLGen_cis_eQTLs	A	2.6868e-45	14.1244	0	CPA3
3:148620881:A:G	eQTLGen	eQTLGen_cis_eQTLs	A	3.2127e-45	14.1118	0	CPA3
17:73318398:A:G	BIOSQTL	BIOS_eQTL_geneLevel	A	1.6723e-44	-13.9949	0	MIF4GD
17:73394449:A:C	BIOSQTL	BIOS_eQTL_geneLevel	A	1.54572e-43	-13.836	0	MIF4GD
17:73394449:A:C	BIOSQTL	BIOS_eQTL_geneLevel	A	1.54572e-43	-13.836	0	MRPS7
17:73397985:C:G	BIOSQTL	BIOS_eQTL_geneLevel	C	1.54572e-43	-13.836	0	MIF4GD
17:73397985:C:G	BIOSQTL	BIOS_eQTL_geneLevel	C	1.54572e-43	-13.836	0	MRPS7
3:148622497:A:G	eQTLGen	eQTLGen_cis_eQTLs	A	3.9284e-42	13.6014	0	CPA3
3:148618086:C:T	eQTLGen	eQTLGen_cis_eQTLs	C	5.5317e-41	13.4068	0	CPA3
3:148617960:C:T	eQTLGen	eQTLGen_cis_eQTLs	C	6.993e-41	13.3893	0	CPA3
3:148617875:A:G	eQTLGen	eQTLGen_cis_eQTLs	A	1.5573e-40	13.3298	0	CPA3
3:148616665:A:G	eQTLGen	eQTLGen_cis_eQTLs	A	2.0797e-40	13.308	0	CPA3
17:73394449:A:C	BIOSQTL	BIOS_eQTL_geneLevel	A	2.39067e-36	-12.5901	0	MIF4GD
17:73397985:C:G	BIOSQTL	BIOS_eQTL_geneLevel	C	3.04843e-36	-12.5709	0	MIF4GD
17:73318398:A:G	BIOSQTL	BIOS_eQTL_geneLevel	A	5.98663e-35	-12.3334	0	MRPS7
17:73394449:A:C	eQTLGen	eQTLGen_cis_eQTLs	A	6.3261e-34	-12.1419	0	GRB2
17:73318398:A:G	eQTLGen	eQTLGen_cis_eQTLs	A	1.3762e-32	11.8875	0	NT5C
17:73318398:A:G	BIOSQTL	BIOS_eQTL_geneLevel	A	5.88468e-32	-11.7653	0	GRB2
3:148618176:G:T	eQTLGen	eQTLGen_cis_eQTLs	G	6.0401e-32	11.7632	0	CPA3
17:73397985:C:G	eQTLGen	eQTLGen_cis_eQTLs	C	9.7399e-32	-11.7228	0	GRB2
3:148618346:G:T	eQTLGen	eQTLGen_cis_eQTLs	G	2.4279e-27	10.832	0	CPA3
11:75878801:C:T	eQTLGen	eQTLGen_cis_eQTLs	C	1.8919e-26	-10.6423	0	WNT11
17:73318398:A:G	eQTLcatalogue	TwinsUK_ge_LCL	A	3.40066e-26	0.111167	1.70033e-22	MRPS7
17:73318398:A:G	BIOSQTL	BIOS_eQTL_geneLevel	A	4.26556e-26	-10.5663	0	GRB2
17:73318398:A:G	BIOSQTL	BIOS_eQTL_geneLevel	A	4.26556e-26	-10.5663	0	AC011933.1
11:75879595:C:T	eQTLGen	eQTLGen_cis_eQTLs	C	6.0407e-25	-10.3147	0	WNT11
11:75879798:C:G	eQTLGen	eQTLGen_cis_eQTLs	C	1.3233e-24	-10.239	0	WNT11
11:75878557:G:T	eQTLGen	eQTLGen_cis_eQTLs	G	2.5378e-24	-10.1758	0	WNT11
17:73318398:A:G	eQTLGen	eQTLGen_cis_eQTLs	A	3.3961e-24	-10.1475	0	ARMC7
17:73318398:A:G	eQTLGen	eQTLGen_cis_eQTLs	A	1.8912e-23	9.9788	0	KIAA0195
17:73318398:A:G	eQTLGen	eQTLGen_cis_eQTLs	A	2.9047e-22	9.7039	0	KCTD2
17:73318398:A:G	eQTLGen	eQTLGen_cis_eQTLs	A	2.9132e-21	9.4659	0	MYO15B
16:77383780:C:T	BIOSQTL	BIOS_eQTL_geneLevel	T	3.00955e-21	9.46249	0	MON1B
17:73397985:C:G	eQTLGen	eQTLGen_cis_eQTLs	C	3.9625e-21	9.4338	0	NUP85
3:148618254:A:G	eQTLGen	eQTLGen_cis_eQTLs	A	3.0553e-20	9.2171	0	CPA3
17:73394449:A:C	eQTLGen	eQTLGen_cis_eQTLs	A	3.2795e-20	9.2096	0	NUP85
17:73311171:C:CT	eQTLcatalogue	Fairfax_2014_LPS24	C	1.51291e-19	0.170947	7.56455e-16	MRPS7
17:73394449:A:C	eQTLGen	eQTLGen_cis_eQTLs	A	2.1177e-19	-9.0069	0	RP11-649A18.12
17:73311171:C:CT	eQTLcatalogue	Fairfax_2014_IFN24	C	3.66511e-19	0.140471	1.83256e-15	MIF4GD
17:73318398:A:G	eQTLcatalogue	Fairfax_2014_IFN24	A	3.97447e-19	0.136768	1.98724e-15	MIF4GD
17:73318398:A:G	GTEx/v8	Thyroid	G	5.1259e-19	0.205277	2.54266e-37	MRPS7
17:73318398:A:G	eQTLcatalogue	Fairfax_2014_LPS24	A	9.07644e-19	0.163263	4.53822e-15	MRPS7
17:73318398:A:G	GTEx/v8	Thyroid	G	1.84427e-18	-0.415183	1.26361e-96	NUP85
4:156561034:A:G	eQTLcatalogue	Quach_2016_ge_monocyte_IAV	A	7.17534e-18	-1.32347	3.58767e-14	GUCY1A3
16:77383780:C:T	eQTLcatalogue	BrainSeq_ge_brain	C	1.6604e-17	-0.724115	8.302e-14	ADAMTS18
17:73394449:A:C	BIOSQTL	BIOS_eQTL_geneLevel	A	2.39153e-17	-8.47286	0	GRB2
17:73397985:C:G	BIOSQTL	BIOS_eQTL_geneLevel	C	2.39153e-17	-8.47286	0	GRB2
17:73318398:A:G	GTEx/v8	Whole_Blood	G	2.3977e-17	0.21766	1.05183e-42	MRPS7
17:73397985:C:G	eQTLGen	eQTLGen_cis_eQTLs	C	3.0982e-17	-8.4427	0	RP11-649A18.12
17:73318398:A:G	eQTLGen	eQTLGen_cis_eQTLs	A	4.557e-17	-8.3974	0	RP11-649A18.12
17:73311171:C:CT	eQTLcatalogue	Fairfax_2014_LPS24	C	7.56646e-17	0.142715	3.78323e-13	MIF4GD
17:73318398:A:G	GTEx/v8	Artery_Tibial	G	3.28991e-16	-0.301492	2.71296e-64	NUP85
17:73318398:A:G	GTEx/v8	Adipose_Subcutaneous	G	3.9933e-16	0.167639	1.06733e-31	MRPS7
17:73318398:A:G	GTEx/v8	Whole_Blood	G	4.04602e-16	0.224068	2.53574e-19	MIF4GD
16:77383780:C:T	eQTLGen	eQTLGen_cis_eQTLs	T	1.6416e-15	-7.9657	0	SYCE1L
17:73318398:A:G	GTEx/v8	Nerve_Tibial	G	1.7765e-15	0.207508	1.49762e-34	MRPS7
17:73394449:A:C	eQTLGen	eQTLGen_cis_eQTLs	A	2.2378e-15	7.9274	0	KIAA0195
17:73318398:A:G	GTEx/v8	Skin_Sun_Exposed_Lower_leg	G	2.70478e-15	0.240654	2.31633e-37	MRPS7
17:73312171:A:AT	eQTLcatalogue	Alasoo_2018_ge_macrophage_IFNg_Salmonella	A	2.75861e-15	0.28292	1.3793e-11	GRB2
17:73397985:C:G	eQTLGen	eQTLGen_cis_eQTLs	C	3.4902e-15	7.8722	0	KIAA0195
4:156561034:A:G	eQTLcatalogue	Quach_2016_ge_monocyte_IAV	A	3.49704e-15	-1.0569	1.74852e-11	GUCY1B3
17:73394449:A:C	eQTLcatalogue	Alasoo_2018_ge_macrophage_IFNg_Salmonella	A	3.79426e-15	0.281272	1.89713e-11	GRB2
17:73397985:C:G	eQTLcatalogue	Alasoo_2018_ge_macrophage_IFNg_Salmonella	C	4.01678e-15	0.281807	2.00839e-11	GRB2
17:73318398:A:G	eQTLcatalogue	Fairfax_2014_LPS24	A	4.66703e-15	0.131408	2.33351e-11	MIF4GD
17:73311171:C:CT	eQTLcatalogue	Fairfax_2014_IFN24	C	1.05586e-14	0.110364	5.2793e-11	MRPS7
17:73318398:A:G	GTEx/v8	Heart_Left_Ventricle	G	1.26037e-14	0.189079	6.01406e-32	MRPS7
17:73312171:A:AT	GTEx/v8	Whole_Blood	AT	1.71775e-14	0.238945	2.53574e-19	MIF4GD
17:73401041:G:GT	eQTLcatalogue	Alasoo_2018_ge_macrophage_IFNg_Salmonella	G	2.12212e-14	0.280624	1.06106e-10	GRB2
17:73311171:C:CT	eQTLcatalogue	Alasoo_2018_ge_macrophage_naive	C	2.15322e-14	0.511314	1.07661e-10	SLC25A19
17:73318398:A:G	GTEx/v8	Adipose_Subcutaneous	G	2.33892e-14	-0.305026	4.03973e-31	NUP85
17:73318398:A:G	eQTLcatalogue	Fairfax_2014_IFN24	A	2.59473e-14	0.106071	1.29737e-10	MRPS7
16:77383780:C:T	BRAINEAC	WHMT	NA	4.06502e-14	8.49814	6.72298e-12	ADAMTS18
17:73318398:A:G	GTEx/v8	Esophagus_Muscularis	G	5.68706e-14	-0.330817	7.63109e-59	NUP85
17:73318398:A:G	BIOSQTL	BIOS_eQTL_geneLevel	A	7.17654e-14	-7.48455	0	SLC25A19
17:73311171:C:CT	eQTLcatalogue	Fairfax_2014_naive	C	8.54622e-14	0.106558	4.27311e-10	SLC25A19
17:73311171:C:CT	eQTLcatalogue	Fairfax_2014_LPS24	C	1.22697e-13	0.173101	6.13485e-10	SLC25A19
17:73318398:A:G	GTEx/v8	Breast_Mammary_Tissue	G	1.26116e-13	0.192827	4.66865e-20	MRPS7
17:73318398:A:G	GTEx/v8	Nerve_Tibial	G	1.34792e-13	0.174432	7.41113e-10	GRB2
17:73318398:A:G	GTEx/v8	Lung	G	1.80215e-13	0.135915	3.38029e-30	MRPS7
17:73318398:A:G	GTEx/v8	Heart_Atrial_Appendage	G	1.97894e-13	0.175894	1.91388e-34	MRPS7
17:73318398:A:G	eQTLcatalogue	Alasoo_2018_ge_macrophage_naive	A	2.2711e-13	0.491926	1.13555e-09	SLC25A19
17:73397985:C:G	GTEx/v8	Whole_Blood	G	2.88136e-13	0.225226	2.53574e-19	MIF4GD
3:148618975:G:T	BIOSQTL	BIOS_eQTL_geneLevel	G	3.04482e-13	7.29243	0	CPA3
3:148619099:A:G	BIOSQTL	BIOS_eQTL_geneLevel	A	3.04482e-13	7.29243	0	CPA3
3:148620881:A:G	BIOSQTL	BIOS_eQTL_geneLevel	A	3.04482e-13	7.29243	0	CPA3
3:148621041:A:C	BIOSQTL	BIOS_eQTL_geneLevel	A	3.04482e-13	7.29243	0	CPA3
3:148621162:A:T	BIOSQTL	BIOS_eQTL_geneLevel	A	3.04482e-13	7.29243	0	CPA3
3:148622497:A:G	BIOSQTL	BIOS_eQTL_geneLevel	A	3.04482e-13	7.29243	0	CPA3
17:73318398:A:G	eQTLcatalogue	Fairfax_2014_LPS24	A	3.46179e-13	0.165673	1.73089e-09	SLC25A19
3:148619595:C:T	BIOSQTL	BIOS_eQTL_geneLevel	C	3.78598e-13	7.2632	0	CPA3
17:73318398:A:G	eQTLGen	eQTLGen_cis_eQTLs	A	3.8939e-13	-7.259	0	SLC16A5
4:156561034:A:G	eQTLcatalogue	Quach_2016_ge_monocyte_IAV	A	3.91063e-13	-1.17555	1.95531e-09	RP11-588K22.2
17:73318398:A:G	GTEx/v8	Nerve_Tibial	G	4.33396e-13	-0.301834	2.63814e-52	NUP85
3:148621388:C:T	BIOSQTL	BIOS_eQTL_geneLevel	C	4.54679e-13	7.23837	0	CPA3
17:73394449:A:C	GTEx/v8	Whole_Blood	C	5.22778e-13	0.222792	2.53574e-19	MIF4GD
3:148618176:G:T	BIOSQTL	BIOS_eQTL_geneLevel	G	5.54609e-13	7.21137	0	CPA3
17:73318398:A:G	GTEx/v8	Adipose_Visceral_Omentum	G	6.0285e-13	-0.191348	5.03175e-14	GGA3
3:148617875:A:G	BIOSQTL	BIOS_eQTL_geneLevel	A	6.15518e-13	7.19702	0	CPA3
3:148617960:C:T	BIOSQTL	BIOS_eQTL_geneLevel	C	6.15518e-13	7.19702	0	CPA3
3:148618086:C:T	BIOSQTL	BIOS_eQTL_geneLevel	C	6.15518e-13	7.19702	0	CPA3
3:148618254:A:G	BIOSQTL	BIOS_eQTL_geneLevel	A	6.15518e-13	7.19702	0	CPA3
3:148618346:G:T	BIOSQTL	BIOS_eQTL_geneLevel	G	6.15518e-13	7.19702	0	CPA3
3:148616665:A:G	BIOSQTL	BIOS_eQTL_geneLevel	A	6.5459e-13	7.18865	0	CPA3
17:73311171:C:CT	eQTLcatalogue	Alasoo_2018_ge_macrophage_IFNg	C	6.67639e-13	0.492137	3.33819e-09	SLC25A19
17:73318398:A:G	GTEx/v8	Adipose_Visceral_Omentum	G	6.96066e-13	-0.336658	7.23042e-49	NUP85
17:73318398:A:G	eQTLcatalogue	Fairfax_2014_naive	A	6.97467e-13	0.100276	3.48734e-09	SLC25A19
16:77383780:C:T	eQTLcatalogue	BrainSeq_ge_brain	C	8.20838e-13	-0.424665	4.10419e-09	RP11-538I12.3
17:73318398:A:G	GTEx/v8	Whole_Blood	G	1.00694e-12	-0.302605	1.32444e-89	NUP85
17:73394449:A:C	BIOSQTL	BIOS_eQTL_geneLevel	A	1.01542e-12	-7.12839	0	AC011933.1
17:73394449:A:C	BIOSQTL	BIOS_eQTL_geneLevel	A	1.01542e-12	-7.12839	0	GRB2
17:73397985:C:G	BIOSQTL	BIOS_eQTL_geneLevel	C	1.01542e-12	-7.12839	0	GRB2
17:73397985:C:G	BIOSQTL	BIOS_eQTL_geneLevel	C	1.01542e-12	-7.12839	0	AC011933.1
17:73318398:A:G	GTEx/v8	Artery_Aorta	G	1.08952e-12	-0.401147	1.16268e-64	NUP85
17:73318398:A:G	GTEx/v8	Cells_Cultured_fibroblasts	G	1.52621e-12	0.127826	2.6834e-33	MRPS7
11:75878557:G:T	BIOSQTL	BIOS_eQTL_geneLevel	G	1.78661e-12	-7.05012	0	WNT11
17:73318398:A:G	GTEx/v8	Muscle_Skeletal	G	1.9528e-12	-0.194132	4.93991e-50	NUP85
11:75879595:C:T	BIOSQTL	BIOS_eQTL_geneLevel	C	1.98121e-12	-7.0358	0	WNT11
11:75879798:C:G	BIOSQTL	BIOS_eQTL_geneLevel	C	1.98121e-12	-7.0358	0	WNT11
17:73318398:A:G	eQTLcatalogue	Alasoo_2018_ge_macrophage_IFNg	A	3.01818e-12	0.476978	1.50909e-08	SLC25A19
11:75878801:C:T	BIOSQTL	BIOS_eQTL_geneLevel	C	3.11579e-12	-6.97238	0	WNT11
17:73311171:C:CT	eQTLcatalogue	Alasoo_2018_ge_macrophage_IFNg_Salmonella	C	3.38399e-12	0.216835	1.69199e-08	GRB2
17:73318398:A:G	eQTLcatalogue	GENCORD_ge_T-cell	A	3.98586e-12	0.142038	1.99293e-08	MRPS7
17:73318398:A:G	GTEx/v8	Esophagus_Muscularis	G	5.31473e-12	0.186816	5.08922e-25	MRPS7
17:73311171:C:CT	eQTLcatalogue	Fairfax_2014_naive	C	5.34206e-12	0.0773689	2.67103e-08	MRPS7
17:73318398:A:G	eQTLcatalogue	Alasoo_2018_ge_macrophage_IFNg_Salmonella	A	6.15474e-12	0.212769	3.07737e-08	GRB2
17:73397985:C:G	eQTLcatalogue	BLUEPRINT_ge_T-cell	C	6.42939e-12	-0.0850448	3.2147e-08	GRB2
17:73394449:A:C	eQTLcatalogue	BLUEPRINT_ge_T-cell	A	6.43773e-12	-0.0850455	3.21887e-08	GRB2
17:73312171:A:AT	eQTLcatalogue	BLUEPRINT_ge_T-cell	A	6.44608e-12	-0.085043	3.22304e-08	GRB2
17:73318398:A:G	GTEx/v8	Skin_Not_Sun_Exposed_Suprapubic	G	6.85039e-12	0.222593	7.22132e-28	MRPS7
17:73318398:A:G	GTEx/v8	Esophagus_Mucosa	G	7.72141e-12	-0.291188	3.91763e-46	NUP85
17:73318398:A:G	GTEx/v8	Breast_Mammary_Tissue	G	7.87332e-12	-0.287546	7.55442e-17	GGA3
17:73318398:A:G	eQTLcatalogue	Fairfax_2014_naive	A	1.03159e-11	0.0745079	5.15795e-08	MRPS7
17:73318398:A:G	GTEx/v8	Brain_Cerebellum	G	1.21808e-11	0.43528	2.35663e-20	MRPS7
17:73394449:A:C	BIOSQTL	BIOS_eQTL_geneLevel	A	1.40878e-11	-6.7568	0	GGA3
17:73394449:A:C	BIOSQTL	BIOS_eQTL_geneLevel	A	1.40878e-11	-6.7568	0	MRPS7
17:73397985:C:G	BIOSQTL	BIOS_eQTL_geneLevel	C	1.40878e-11	-6.7568	0	GGA3
17:73397985:C:G	BIOSQTL	BIOS_eQTL_geneLevel	C	1.40878e-11	-6.7568	0	MRPS7
17:73318398:A:G	GTEx/v8	Spleen	G	3.77852e-11	0.34093	9.73263e-28	MRPS7
17:73318398:A:G	GTEx/v8	Muscle_Skeletal	G	6.40227e-11	0.100143	1.50461e-25	MRPS7
17:73311171:C:CT	eQTLcatalogue	GENCORD_ge_T-cell	C	6.94478e-11	0.136851	3.47239e-07	MRPS7
17:73318398:A:G	GTEx/v8	Brain_Cerebellum	G	7.81656e-11	-0.510479	2.33052e-57	NUP85
17:73318398:A:G	GTEx/v8	Stomach	G	1.09384e-10	0.211473	3.46137e-21	MRPS7
17:73318398:A:G	GTEx/v8	Brain_Cerebellar_Hemisphere	G	1.25951e-10	0.347066	8.444e-19	MRPS7
17:73312171:A:AT	eQTLcatalogue	BLUEPRINT_ge_neutrophil	A	1.514e-10	0.312775	7.57e-07	MIF4GD
17:73394449:A:C	eQTLcatalogue	BLUEPRINT_ge_neutrophil	A	1.58033e-10	0.311439	7.90165e-07	MIF4GD
17:73397985:C:G	eQTLcatalogue	BLUEPRINT_ge_neutrophil	C	1.58112e-10	0.311428	7.9056e-07	MIF4GD
17:73318398:A:G	GTEx/v8	Pituitary	G	1.59857e-10	0.287465	3.91295e-18	MRPS7
17:73318398:A:G	GTEx/v8	Artery_Aorta	G	1.983e-10	0.192274	2.29497e-22	MRPS7
17:73318398:A:G	BIOSQTL	BIOS_eQTL_geneLevel	A	2.00706e-10	6.36093	0	CASKIN2
17:73318398:A:G	GTEx/v8	Skin_Sun_Exposed_Lower_leg	G	2.51667e-10	0.143129	4.42147e-07	GRB2
17:73311171:C:CT	eQTLcatalogue	Fairfax_2014_naive	C	2.6176e-10	0.0739948	1.3088e-06	MIF4GD
16:77383780:C:T	BRAINEAC	HIPP	NA	2.75033e-10	6.89071	6.46074e-08	ADAMTS18
17:73318398:A:G	GTEx/v8	Artery_Tibial	G	2.96321e-10	0.141108	6.0175e-19	MRPS7
17:73318398:A:G	GTEx/v8	Pancreas	G	3.40516e-10	0.307551	1.0586e-22	MRPS7
16:77383780:C:T	BIOSQTL	BIOS_eQTL_geneLevel	T	3.57816e-10	-6.27121	0	SYCE1L
17:73318398:A:G	GTEx/v8	Adipose_Subcutaneous	G	3.84188e-10	-0.199959	2.37177e-19	GGA3
17:73312171:A:AT	eQTLcatalogue	Fairfax_2014_naive	A	3.97127e-10	0.104589	1.98564e-06	SLC25A19
16:77383780:C:T	BRAINEAC	MEDU	NA	4.05242e-10	6.82906	5.92383e-08	ADAMTS18
17:73318398:A:G	eQTLcatalogue	Fairfax_2014_naive	A	5.15298e-10	0.0710403	2.57649e-06	MIF4GD
17:73318398:A:G	GTEx/v8	Testis	G	6.09882e-10	-0.419034	1.89028e-56	NUP85
17:73312171:A:AT	GTEx/v8	Adipose_Subcutaneous	AT	6.54798e-10	-0.285622	4.03973e-31	NUP85
17:73394449:A:C	eQTLcatalogue	TwinsUK_ge_LCL	A	7.30152e-10	0.0772246	3.65076e-06	MRPS7
17:73397985:C:G	eQTLcatalogue	TwinsUK_ge_LCL	C	7.30152e-10	0.0772246	3.65076e-06	MRPS7
17:73318398:A:G	eQTLcatalogue	Lepik_2017_ge_blood	A	7.72319e-10	0.0610047	3.8616e-06	MRPS7
17:73394449:A:C	eQTLcatalogue	Alasoo_2018_ge_macrophage_Salmonella	A	7.96301e-10	0.195563	3.98151e-06	GRB2
17:73397985:C:G	eQTLcatalogue	Alasoo_2018_ge_macrophage_Salmonella	C	8.4647e-10	0.195811	4.23235e-06	GRB2
17:73318398:A:G	eQTLcatalogue	Fairfax_2014_IFN24	A	1.06716e-09	0.115615	5.3358e-06	SLC25A19
17:73318398:A:G	BIOSQTL	BIOS_eQTL_geneLevel	A	1.12911e-09	6.09005	6.15953e-06	ARMC7
17:73312171:A:AT	GTEx/v8	Artery_Tibial	AT	1.28075e-09	-0.267675	2.71296e-64	NUP85
17:73312171:A:AT	eQTLcatalogue	Fairfax_2014_LPS2	A	1.31459e-09	0.193011	6.57295e-06	GRB2
17:73312171:A:AT	GTEx/v8	Thyroid	AT	1.54099e-09	-0.325204	1.26361e-96	NUP85
17:73311171:C:CT	eQTLcatalogue	Alasoo_2018_ge_macrophage_IFNg	C	1.54793e-09	0.198582	7.73965e-06	MRPS7
17:73394449:A:C	GTEx/v8	Adipose_Subcutaneous	C	1.73056e-09	-0.278128	4.03973e-31	NUP85
17:73397985:C:G	GTEx/v8	Adipose_Subcutaneous	G	1.98371e-09	-0.277117	4.03973e-31	NUP85
17:73311171:C:CT	eQTLcatalogue	Fairfax_2014_IFN24	C	2.09667e-09	0.116624	1.04834e-05	SLC25A19
17:73318398:A:G	BIOSQTL	BIOS_eQTL_geneLevel	A	2.22044e-09	-5.98075	6.06907e-06	SLC25A19
17:73318398:A:G	BIOSQTL	BIOS_eQTL_geneLevel	A	2.22044e-09	-5.98075	6.06907e-06	RP11-649A18.12
17:73401041:G:GT	eQTLcatalogue	Alasoo_2018_ge_macrophage_Salmonella	G	2.38543e-09	0.194331	1.19271e-05	GRB2
17:73318398:A:G	GTEx/v8	Pituitary	G	2.60244e-09	-0.427431	3.86684e-42	NUP85
17:73312171:A:AT	eQTLcatalogue	Alasoo_2018_ge_macrophage_Salmonella	A	2.62969e-09	0.191168	1.31485e-05	GRB2
16:77383780:C:T	BIOSQTL	BIOS_eQTL_geneLevel	T	3.11538e-09	5.92543	6.02627e-06	MON1B
16:77383780:C:T	BIOSQTL	BIOS_eQTL_geneLevel	T	3.11538e-09	5.92543	6.02627e-06	RP11-538I12.2
16:77383780:C:T	BIOSQTL	BIOS_eQTL_geneLevel	T	3.11538e-09	5.92543	6.02627e-06	SYCE1L
17:73318398:A:G	eQTLcatalogue	Alasoo_2018_ge_macrophage_IFNg	A	3.21814e-09	0.193523	1.60907e-05	MRPS7
17:73394449:A:C	eQTLcatalogue	Fairfax_2014_LPS2	A	3.46222e-09	0.113377	1.73111e-05	GRB2
17:73397985:C:G	eQTLcatalogue	Fairfax_2014_LPS2	C	4.08265e-09	0.113034	2.04132e-05	GRB2
17:73311171:C:CT	eQTLcatalogue	Fairfax_2014_LPS2	C	4.41614e-09	0.159971	2.20807e-05	GRB2
17:73318398:A:G	GTEx/v8	Lung	G	4.46476e-09	-0.265955	1.81641e-51	NUP85
17:73318398:A:G	eQTLcatalogue	TwinsUK_ge_fat	A	4.65225e-09	-0.0595704	2.32613e-05	NUP85
17:73394449:A:C	eQTLcatalogue	Fairfax_2014_LPS2	A	4.70209e-09	0.184348	2.35105e-05	GRB2
17:73394449:A:C	GTEx/v8	Artery_Tibial	C	5.17564e-09	-0.254402	2.71296e-64	NUP85
17:73397985:C:G	GTEx/v8	Artery_Tibial	G	5.17564e-09	-0.254402	2.71296e-64	NUP85
17:73397985:C:G	eQTLcatalogue	Fairfax_2014_LPS2	C	5.1992e-09	0.184092	2.5996e-05	GRB2
17:73394449:A:C	GTEx/v8	Thyroid	C	5.28788e-09	-0.317079	1.26361e-96	NUP85
17:73397985:C:G	GTEx/v8	Thyroid	G	5.28788e-09	-0.317079	1.26361e-96	NUP85
17:73397985:C:G	eQTLcatalogue	Alasoo_2018_ge_macrophage_naive	C	5.3681e-09	0.498915	2.68405e-05	SLC25A19
17:73318398:A:G	eQTLcatalogue	TwinsUK_ge_LCL	A	5.52964e-09	-0.0546444	2.76482e-05	NUP85
17:73318398:A:G	GTEx/v8	Brain_Cerebellar_Hemisphere	G	5.77844e-09	-0.472807	1.4438e-49	NUP85
17:73318398:A:G	GTEx/v8	Heart_Atrial_Appendage	G	5.80453e-09	-0.312979	6.76469e-37	NUP85
17:73394449:A:C	eQTLcatalogue	Alasoo_2018_ge_macrophage_naive	A	5.81867e-09	0.496739	2.90934e-05	SLC25A19
17:73311171:C:CT	eQTLcatalogue	CEDAR_neutrophil_CD15	C	5.9199e-09	0.112772	2.95995e-05	GRB2
17:73312171:A:AT	eQTLcatalogue	Alasoo_2018_ge_macrophage_naive	A	6.06855e-09	0.497485	3.03428e-05	SLC25A19
17:73312171:A:AT	GTEx/v8	Thyroid	AT	6.11332e-09	0.152665	2.54266e-37	MRPS7
17:73401041:G:GT	eQTLcatalogue	Alasoo_2018_ge_macrophage_naive	G	6.36673e-09	0.504078	3.18336e-05	SLC25A19
17:73401041:G:GT	eQTLcatalogue	Fairfax_2014_LPS2	G	6.5935e-09	0.18559	3.29675e-05	GRB2
17:73318398:A:G	eQTLcatalogue	Fairfax_2014_IFN24	A	6.95594e-09	0.0782116	3.47797e-05	GGA3
17:73312171:A:AT	eQTLcatalogue	Fairfax_2014_LPS2	A	7.08636e-09	0.112738	3.54318e-05	GRB2
17:73312171:A:AT	eQTLcatalogue	Fairfax_2014_LPS24	A	7.53165e-09	0.117985	3.76583e-05	MIF4GD
17:73318398:A:G	GTEx/v8	Heart_Left_Ventricle	G	7.96894e-09	-0.258259	9.46285e-37	NUP85
16:77383780:C:T	GTEx/v8	Testis	T	8.04253e-09	-0.446944	2.53395e-31	VN2R10P
17:73394449:A:C	eQTLcatalogue	Fairfax_2014_naive	A	8.12143e-09	0.0954535	4.06072e-05	SLC25A19
17:73311171:C:CT	eQTLcatalogue	Fairfax_2014_IFN24	C	8.1593e-09	0.0799022	4.07965e-05	GGA3
17:73318398:A:G	eQTLcatalogue	Fairfax_2014_LPS2	A	8.27495e-09	0.153689	4.13747e-05	GRB2
17:73397985:C:G	eQTLcatalogue	Fairfax_2014_naive	C	8.38244e-09	0.0955291	4.19122e-05	SLC25A19
17:73394449:A:C	eQTLcatalogue	Fairfax_2014_LPS24	A	9.23551e-09	0.11463	4.61775e-05	MIF4GD
17:73318398:A:G	GTEx/v8	Colon_Transverse	G	9.78613e-09	0.134871	1.30385e-29	MRPS7
17:73397985:C:G	eQTLcatalogue	Fairfax_2014_LPS24	C	1.07515e-08	0.114252	5.37575e-05	MIF4GD
17:73312171:A:AT	GTEx/v8	Adipose_Visceral_Omentum	AT	1.14518e-08	-0.177075	5.03175e-14	GGA3
17:73312171:A:AT	eQTLcatalogue	Fairfax_2014_IFN24	A	1.18731e-08	0.108766	5.93655e-05	MIF4GD
17:73394449:A:C	GTEx/v8	Thyroid	C	1.31832e-08	0.150496	2.54266e-37	MRPS7
17:73397985:C:G	GTEx/v8	Thyroid	G	1.31832e-08	0.150496	2.54266e-37	MRPS7
17:73401041:G:GT	eQTLcatalogue	Fairfax_2014_LPS24	G	1.345e-08	0.114761	6.725e-05	MIF4GD
17:73394449:A:C	BIOSQTL	BIOS_eQTL_geneLevel	A	1.40154e-08	-5.67303	2.33454e-05	RP11-649A18.12
17:73394449:A:C	BIOSQTL	BIOS_eQTL_geneLevel	A	1.40154e-08	-5.67303	2.33454e-05	SLC25A19
17:73394449:A:C	GTEx/v8	Nerve_Tibial	C	1.40457e-08	0.152927	7.41113e-10	GRB2
17:73397985:C:G	GTEx/v8	Nerve_Tibial	G	1.49387e-08	0.152546	7.41113e-10	GRB2
17:73397985:C:G	BIOSQTL	BIOS_eQTL_geneLevel	C	1.52435e-08	-5.6588	2.33114e-05	RP11-649A18.12
17:73397985:C:G	BIOSQTL	BIOS_eQTL_geneLevel	C	1.52435e-08	-5.6588	2.33114e-05	SLC25A19
17:73312171:A:AT	GTEx/v8	Adipose_Visceral_Omentum	AT	1.9443e-08	-0.30757	7.23042e-49	NUP85
17:73401041:G:GT	eQTLcatalogue	Fairfax_2014_LPS2	G	1.95514e-08	0.109839	9.7757e-05	GRB2
17:73397985:C:G	eQTLcatalogue	Fairfax_2014_IFN24	C	2.13838e-08	0.104685	0.000106919	MIF4GD
17:73394449:A:C	eQTLcatalogue	Fairfax_2014_IFN24	A	2.15482e-08	0.104579	0.000107741	MIF4GD
17:73397985:C:G	eQTLGen	eQTLGen_cis_eQTLs	C	2.1584e-08	-5.5986	0.00010846	SLC16A5
17:73394449:A:C	eQTLGen	eQTLGen_cis_eQTLs	A	2.2062e-08	-5.5948	0.000108453	SLC16A5
17:73318398:A:G	GTEx/v8	Prostate	G	2.30019e-08	-0.453956	6.95112e-40	NUP85
17:73318398:A:G	eQTLcatalogue	CEDAR_T-cell_CD8	A	2.45922e-08	-0.0554274	0.000122961	SLC25A19
17:73318398:A:G	eQTLcatalogue	CEDAR_neutrophil_CD15	A	2.48539e-08	0.106773	0.00012427	GRB2
17:73312171:A:AT	GTEx/v8	Nerve_Tibial	AT	2.60873e-08	0.149684	7.41113e-10	GRB2
17:73318398:A:G	GTEx/v8	Colon_Sigmoid	G	2.74768e-08	-0.354828	4.96249e-45	NUP85
17:73394449:A:C	BIOSQTL	BIOS_eQTL_geneLevel	A	3.02126e-08	-5.54017	4.58742e-05	MRPS7
17:73397985:C:G	BIOSQTL	BIOS_eQTL_geneLevel	C	3.02126e-08	-5.54017	4.58742e-05	MRPS7
17:73318398:A:G	GTEx/v8	Skin_Not_Sun_Exposed_Suprapubic	G	3.1551e-08	-0.234362	3.46601e-49	NUP85
17:73401041:G:GT	eQTLcatalogue	Fairfax_2014_naive	G	3.37719e-08	0.0926794	0.000168859	SLC25A19
16:77383780:C:T	GTEx/v8	Thyroid	T	3.41197e-08	-0.226157	3.24188e-60	SYCE1L
17:73312171:A:AT	eQTLcatalogue	Fairfax_2014_naive	A	3.69995e-08	0.0751566	0.000184998	MIF4GD
17:73318398:A:G	GTEx/v8	Lung	G	4.19044e-08	0.175432	8.8486e-08	SLC25A19
17:73318398:A:G	GTEx/v8	Heart_Left_Ventricle	G	4.78931e-08	-0.19565	5.31372e-06	GGA3
17:73318398:A:G	GTEx/v8	Pancreas	G	4.95351e-08	-0.395107	4.75046e-55	NUP85
17:73394449:A:C	GTEx/v8	Lung	C	5.77601e-08	0.111728	3.38029e-30	MRPS7
17:73397985:C:G	GTEx/v8	Lung	G	5.77601e-08	0.111728	3.38029e-30	MRPS7
17:73394449:A:C	eQTLcatalogue	Fairfax_2014_LPS24	A	6.10648e-08	0.120781	0.000305324	MRPS7
17:73318398:A:G	GTEx/v8	Colon_Transverse	G	6.70836e-08	-0.319455	6.21978e-46	NUP85
16:77383780:C:T	BRAINEAC	SNIG	NA	6.71841e-08	5.83792	1.37252e-05	ADAMTS18
11:75879798:C:G	eQTLGen	eQTLGen_cis_eQTLs	C	7.0772e-08	5.3893	0.000289983	UVRAG
17:73397985:C:G	eQTLcatalogue	Fairfax_2014_LPS24	C	7.5418e-08	0.120089	0.00037709	MRPS7
17:73318398:A:G	DICE	T_CD8_naive	G	7.76345e-08	-0.745283	0.049	NUP85
17:73394449:A:C	GTEx/v8	Adipose_Subcutaneous	C	8.46957e-08	0.128456	1.06733e-31	MRPS7
17:73311171:C:CT	eQTLcatalogue	CEDAR_T-cell_CD8	C	9.12883e-08	-0.0540131	0.000456442	SLC25A19
17:73312171:A:AT	eQTLcatalogue	Fairfax_2014_LPS24	A	9.59072e-08	0.121837	0.000479536	MRPS7
17:73397985:C:G	GTEx/v8	Adipose_Subcutaneous	G	9.85417e-08	0.127805	1.06733e-31	MRPS7
17:73312171:A:AT	eQTLcatalogue	CEDAR_neutrophil_CD15	A	1.10145e-07	0.118768	0.000550725	GRB2
17:73394449:A:C	GTEx/v8	Adipose_Visceral_Omentum	C	1.17027e-07	-0.161833	5.03175e-14	GGA3
17:73397985:C:G	GTEx/v8	Adipose_Visceral_Omentum	G	1.17027e-07	-0.161833	5.03175e-14	GGA3
11:75879595:C:T	eQTLGen	eQTLGen_cis_eQTLs	C	1.2205e-07	5.2904	0.000394984	UVRAG
17:73318398:A:G	eQTLcatalogue	CEDAR_monocyte_CD14	A	1.2224e-07	0.0790745	0.0006112	SLC25A19
17:73312171:A:AT	GTEx/v8	Adipose_Subcutaneous	AT	1.35761e-07	0.126708	1.06733e-31	MRPS7
17:73318398:A:G	GTEx/v8	Nerve_Tibial	G	1.40038e-07	-0.17126	5.89605e-18	LLGL2
17:73311171:C:CT	eQTLcatalogue	CEDAR_monocyte_CD14	C	1.52757e-07	0.0796803	0.000763785	SLC25A19
11:75878557:G:T	eQTLGen	eQTLGen_cis_eQTLs	G	1.604e-07	5.2403	0.000537836	UVRAG
17:73312171:A:AT	GTEx/v8	Whole_Blood	AT	1.62511e-07	0.154561	1.05183e-42	MRPS7
17:73394449:A:C	DICE	Monocyte_classical	C	1.62668e-07	0.835901	0.049	MIF4GD
17:73318398:A:G	BIOSQTL	BIOS_eQTL_geneLevel	A	1.6624e-07	-5.23359	9.90317e-05	SUMO2
17:73318398:A:G	BIOSQTL	BIOS_eQTL_geneLevel	A	1.6624e-07	-5.23359	9.90317e-05	HN1
17:73318398:A:G	GTEx/v8	Liver	G	1.77634e-07	0.317602	3.87078e-21	MRPS7
17:73394449:A:C	eQTLcatalogue	CEDAR_neutrophil_CD15	A	1.84785e-07	0.114073	0.000923925	GRB2
16:77383780:C:T	GTEx/v8	Brain_Nucleus_accumbens_basal_ganglia	T	1.93408e-07	-0.517215	5.08037e-29	ADAMTS18
17:73397985:C:G	eQTLcatalogue	CEDAR_neutrophil_CD15	C	1.95244e-07	0.113834	0.00097622	GRB2
17:73394449:A:C	GTEx/v8	Whole_Blood	C	1.98507e-07	0.151637	1.05183e-42	MRPS7
17:73318398:A:G	GTEx/v8	Adrenal_Gland	G	2.35954e-07	0.264673	2.27015e-20	MRPS7
17:73318398:A:G	GTEx/v8	Liver	G	2.53193e-07	0.340798	1.405e-06	SLC25A19
17:73311171:C:CT	eQTLcatalogue	Alasoo_2018_ge_macrophage_naive	C	2.60683e-07	0.154494	0.00130342	MRPS7
17:73397985:C:G	BIOSQTL	BIOS_eQTL_geneLevel	C	2.7154e-07	-5.14211	0.000201163	SLC25A19
17:73394449:A:C	BIOSQTL	BIOS_eQTL_geneLevel	A	2.77383e-07	-5.13814	0.000201065	SLC25A19
17:73397985:C:G	DICE	Monocyte_classical	G	2.91733e-07	0.82424	0.049	MIF4GD
17:73397985:C:G	GTEx/v8	Whole_Blood	G	3.08267e-07	0.149323	1.05183e-42	MRPS7
17:73318398:A:G	eQTLcatalogue	Fairfax_2014_IFN24	A	3.35757e-07	0.0779658	0.00167878	NUP85
17:73394449:A:C	eQTLcatalogue	TwinsUK_ge_blood	A	3.42248e-07	0.0876261	0.00171124	MIF4GD
17:73397985:C:G	eQTLcatalogue	TwinsUK_ge_blood	C	3.42248e-07	0.0876261	0.00171124	MIF4GD
17:73312171:A:AT	eQTLcatalogue	Lepik_2017_ge_blood	A	3.48259e-07	-0.155936	0.00174129	MYO15B
17:73394449:A:C	eQTLcatalogue	Fairfax_2014_naive	A	3.5674e-07	0.0687566	0.0017837	MIF4GD
17:73312171:A:AT	DICE	Monocyte_classical	AT	3.79296e-07	0.820289	0.049	MIF4GD
17:73394449:A:C	eQTLcatalogue	Lepik_2017_ge_blood	A	4.1312e-07	-0.152806	0.0020656	MYO15B
17:73311171:C:CT	eQTLcatalogue	Fairfax_2014_LPS24	C	4.14027e-07	0.12809	0.00207014	GRB2
17:73318398:A:G	eQTLcatalogue	Alasoo_2018_ge_macrophage_naive	A	4.28433e-07	0.150595	0.00214217	MRPS7
17:73394449:A:C	BIOSQTL	BIOS_eQTL_geneLevel	A	4.2859e-07	5.05581	0.000300558	NUP85
17:73397985:C:G	BIOSQTL	BIOS_eQTL_geneLevel	C	4.2859e-07	5.05581	0.000300558	NUP85
17:73311171:C:CT	eQTLcatalogue	Fairfax_2014_IFN24	C	4.3688e-07	0.0792478	0.0021844	NUP85
17:73397985:C:G	eQTLcatalogue	Fairfax_2014_naive	C	4.47847e-07	0.0683043	0.00223924	MIF4GD
17:73318398:A:G	GTEx/v8	Lung	G	5.21847e-07	-0.138576	2.47949e-17	GGA3
17:73318398:A:G	GTEx/v8	Stomach	G	5.90596e-07	-0.314155	2.33554e-28	NUP85
17:73311171:C:CT	eQTLcatalogue	GENCORD_ge_LCL	C	6.25872e-07	0.0736655	0.00312936	MRPS7
17:73318398:A:G	eQTLcatalogue	GENCORD_ge_LCL	A	6.27454e-07	0.0719553	0.00313727	MRPS7
16:77383780:C:T	BRAINEAC	OCTX	NA	6.88518e-07	5.2266	0.000184282	ADAMTS18
17:73318398:A:G	eQTLcatalogue	Fairfax_2014_LPS24	A	7.11703e-07	0.122269	0.00355851	GRB2
17:73401041:G:GT	eQTLcatalogue	Alasoo_2018_ge_macrophage_IFNg	G	7.23751e-07	0.443783	0.00361875	SLC25A19
17:73394449:A:C	GTEx/v8	Adipose_Visceral_Omentum	C	7.29004e-07	-0.267477	7.23042e-49	NUP85
17:73397985:C:G	GTEx/v8	Adipose_Visceral_Omentum	G	7.29004e-07	-0.267477	7.23042e-49	NUP85
17:73397985:C:G	eQTLcatalogue	Alasoo_2018_ge_macrophage_IFNg	C	7.52152e-07	0.436939	0.00376076	SLC25A19
17:73318398:A:G	GTEx/v8	Whole_Blood	G	7.52997e-07	0.0766099	2.44276e-05	GRB2
17:73394449:A:C	eQTLcatalogue	Alasoo_2018_ge_macrophage_IFNg	A	7.80483e-07	0.4353	0.00390241	SLC25A19
17:73311171:C:CT	eQTLcatalogue	Alasoo_2018_ge_macrophage_Salmonella	C	7.9714e-07	0.137052	0.0039857	GRB2
17:73401041:G:GT	eQTLcatalogue	Fairfax_2014_LPS24	G	9.13821e-07	0.11123	0.0045691	MRPS7
16:77383780:C:T	GTEx/v8	Adipose_Subcutaneous	T	9.47148e-07	-0.263335	1.72746e-98	SYCE1L
17:73312171:A:AT	GTEx/v8	Lung	AT	9.54367e-07	0.10305	3.38029e-30	MRPS7
17:73318398:A:G	GTEx/v8	Esophagus_Muscularis	G	9.78012e-07	-0.253122	6.54891e-27	LLGL2
17:73312171:A:AT	eQTLcatalogue	BLUEPRINT_ge_monocyte	A	9.83518e-07	0.139378	0.00491759	MIF4GD
17:73318398:A:G	eQTLcatalogue	Fairfax_2012_B-cell_CD19	A	9.95744e-07	-0.0667566	0.00497872	SLC25A19
17:73318398:A:G	eQTLcatalogue	Fairfax_2014_IFN24	A	1.07756e-06	0.094175	0.0053878	GGA3
17:73311171:C:CT	eQTLcatalogue	Fairfax_2012_B-cell_CD19	C	1.10381e-06	-0.0681462	0.00551905	SLC25A19
17:73394449:A:C	eQTLGen	eQTLGen_cis_eQTLs	A	1.1342e-06	-4.8667	0.00342445	ARMC7
17:73397985:C:G	GTEx/v8	Muscle_Skeletal	G	1.13462e-06	-0.127155	4.78486e-05	SLC25A19
17:73397985:C:G	BIOSQTL	BIOS_eQTL_geneLevel	C	1.14457e-06	4.86503	0.000986379	MYO15B
17:73397985:C:G	BIOSQTL	BIOS_eQTL_geneLevel	C	1.14457e-06	4.86503	0.000986379	RECQL5
17:73318398:A:G	eQTLGen	eQTLGen_cis_eQTLs	A	1.1574e-06	-4.8627	0.00350287	SUMO2
17:73312171:A:AT	GTEx/v8	Adipose_Subcutaneous	AT	1.16361e-06	0.169178	6.12399e-05	MIF4GD
17:73394449:A:C	BIOSQTL	BIOS_eQTL_geneLevel	A	1.16794e-06	4.86103	0.000996452	RECQL5
17:73394449:A:C	BIOSQTL	BIOS_eQTL_geneLevel	A	1.16794e-06	4.86103	0.000996452	MYO15B
17:73401041:G:GT	eQTLcatalogue	Fairfax_2014_IFN24	G	1.3349e-06	0.0916426	0.0066745	MIF4GD
17:73394449:A:C	eQTLcatalogue	TwinsUK_ge_LCL	A	1.4103e-06	-0.226634	0.0070515	MYO15B
17:73397985:C:G	eQTLcatalogue	TwinsUK_ge_LCL	C	1.4103e-06	-0.226634	0.0070515	MYO15B
17:73397985:C:G	GTEx/v8	Adipose_Subcutaneous	G	1.47001e-06	0.167244	6.12399e-05	MIF4GD
17:73401041:G:GT	eQTLcatalogue	Fairfax_2014_naive	G	1.48033e-06	0.0659318	0.00740165	MIF4GD
17:73394449:A:C	GTEx/v8	Muscle_Skeletal	C	1.48885e-06	-0.125806	4.78486e-05	SLC25A19
11:75878801:C:T	eQTLGen	eQTLGen_cis_eQTLs	C	1.4973e-06	4.8118	0.00450363	UVRAG
5:17775271:C:T	eQTLcatalogue	BrainSeq_ge_brain	C	1.51723e-06	0.330174	0.00758615	RP11-454P21.1
17:73394449:A:C	eQTLcatalogue	BLUEPRINT_ge_monocyte	A	1.53127e-06	0.136535	0.00765635	MIF4GD
17:73397985:C:G	eQTLcatalogue	BLUEPRINT_ge_monocyte	C	1.53187e-06	0.136529	0.00765935	MIF4GD
17:73394449:A:C	GTEx/v8	Adipose_Subcutaneous	C	1.54177e-06	0.166935	6.12399e-05	MIF4GD
17:73318398:A:G	GTEx/v8	Esophagus_Gastroesophageal_Junction	G	1.61061e-06	-0.296394	5.24818e-41	NUP85
3:148622497:A:G	GTEx/v8	Skin_Sun_Exposed_Lower_leg	G	1.63418e-06	-0.150674	1.51225e-05	CPA3
17:73394449:A:C	eQTLGen	eQTLGen_cis_eQTLs	A	1.6579e-06	4.7913	0.00489557	KCTD2
17:73318398:A:G	eQTLcatalogue	Alasoo_2018_ge_macrophage_Salmonella	A	1.68281e-06	0.132187	0.00841405	GRB2
16:77383780:C:T	BRAINEAC	PUTM	NA	1.71462e-06	5.01898	0.00082182	ADAMTS18
17:73397985:C:G	eQTLGen	eQTLGen_cis_eQTLs	C	1.7408e-06	-4.7813	0.00516769	ARMC7
17:73318398:A:G	GTEx/v8	Adipose_Visceral_Omentum	G	1.7738e-06	0.0861083	8.09441e-15	MRPS7
17:73318398:A:G	GTEx/v8	Nerve_Tibial	G	1.80049e-06	0.138823	5.28625e-09	MIF4GD
17:73318398:A:G	DICE	Monocyte_classical	G	1.95323e-06	0.644898	0.049	MRPS7
17:73318398:A:G	GTEx/v8	Breast_Mammary_Tissue	G	1.97592e-06	-0.258517	5.14299e-31	NUP85
3:148619099:A:G	GTEx/v8	Skin_Sun_Exposed_Lower_leg	G	2.06476e-06	-0.148931	1.51225e-05	CPA3
3:148619595:C:T	GTEx/v8	Skin_Sun_Exposed_Lower_leg	T	2.06476e-06	-0.148931	1.51225e-05	CPA3
3:148620710:T:TAA	GTEx/v8	Skin_Sun_Exposed_Lower_leg	TAA	2.06476e-06	-0.148931	1.51225e-05	CPA3
3:148620881:A:G	GTEx/v8	Skin_Sun_Exposed_Lower_leg	G	2.06476e-06	-0.148931	1.51225e-05	CPA3
3:148621041:A:C	GTEx/v8	Skin_Sun_Exposed_Lower_leg	C	2.06476e-06	-0.148931	1.51225e-05	CPA3
3:148621162:A:T	GTEx/v8	Skin_Sun_Exposed_Lower_leg	T	2.06476e-06	-0.148931	1.51225e-05	CPA3
3:148621388:C:T	GTEx/v8	Skin_Sun_Exposed_Lower_leg	T	2.06476e-06	-0.148931	1.51225e-05	CPA3
3:148621419:C:CA	GTEx/v8	Skin_Sun_Exposed_Lower_leg	CA	2.06476e-06	-0.148931	1.51225e-05	CPA3
17:73312171:A:AT	eQTLcatalogue	Alasoo_2018_ge_macrophage_IFNg	A	2.19859e-06	0.420631	0.010993	SLC25A19
17:73312171:A:AT	GTEx/v8	Skin_Sun_Exposed_Lower_leg	AT	2.19883e-06	0.120384	4.42147e-07	GRB2
17:73311171:C:CT	eQTLcatalogue	Kasela_2017_T-cell_CD8	C	2.21368e-06	-0.0987915	0.0110684	NT5C
17:73318398:A:G	eQTLcatalogue	TwinsUK_ge_fat	A	2.27752e-06	0.0515377	0.0113876	MRPS7
17:73318398:A:G	GTEx/v8	Skin_Sun_Exposed_Lower_leg	G	2.47981e-06	0.119265	1.94746e-08	KIAA0195
17:73311171:C:CT	eQTLcatalogue	Alasoo_2018_ge_macrophage_IFNg	C	2.50838e-06	0.205511	0.0125419	MIF4GD
17:73311171:C:CT	eQTLcatalogue	Fairfax_2014_IFN24	C	2.53819e-06	0.0933361	0.012691	GGA3
17:73318398:A:G	eQTLcatalogue	Kasela_2017_T-cell_CD8	A	2.54584e-06	-0.0974654	0.0127292	NT5C
17:73312171:A:AT	DICE	B_cell_naive	AT	2.54896e-06	0.774311	0.049	RP11-649A18.12
17:73318398:A:G	GTEx/v8	Nerve_Tibial	G	2.55001e-06	-0.138965	5.70018e-08	GGA3
17:73394449:A:C	DICE	B_cell_naive	C	2.97457e-06	0.764069	0.049	RP11-649A18.12
17:73318398:A:G	DICE	T_CD4_TH17	G	2.98175e-06	-0.658055	0.049	NUP85
3:148617875:A:G	GTEx/v8	Skin_Sun_Exposed_Lower_leg	G	3.07248e-06	-0.147347	1.51225e-05	CPA3
3:148617960:C:T	GTEx/v8	Skin_Sun_Exposed_Lower_leg	T	3.07248e-06	-0.147347	1.51225e-05	CPA3
3:148618086:C:T	GTEx/v8	Skin_Sun_Exposed_Lower_leg	T	3.07248e-06	-0.147347	1.51225e-05	CPA3
3:148618176:G:T	GTEx/v8	Skin_Sun_Exposed_Lower_leg	T	3.07248e-06	-0.147347	1.51225e-05	CPA3
3:148618346:G:T	GTEx/v8	Skin_Sun_Exposed_Lower_leg	T	3.07248e-06	-0.147347	1.51225e-05	CPA3
17:73318398:A:G	DICE	T_CD4_TH1	G	3.07611e-06	-0.74564	0.049	NUP85
5:10205917:G:GTTATTA	eQTLcatalogue	Fairfax_2014_naive	G	3.19545e-06	-0.18898	0.0159773	2021-03-06
17:73318398:A:G	eQTLcatalogue	Alasoo_2018_ge_macrophage_naive	A	3.32038e-06	0.102671	0.0166019	GRB2
17:73397985:C:G	BIOSQTL	BIOS_eQTL_geneLevel	C	3.52478e-06	4.6377	0.00256242	MYO15B
17:73318398:A:G	eQTLcatalogue	TwinsUK_ge_LCL	A	3.56827e-06	-0.0395444	0.0178413	GRB2
17:73397985:C:G	GTEx/v8	Skin_Sun_Exposed_Lower_leg	G	3.5995e-06	0.159929	2.31633e-37	MRPS7
17:73394449:A:C	BIOSQTL	BIOS_eQTL_geneLevel	A	3.66373e-06	4.62975	0.00268991	MYO15B
17:73397985:C:G	GTEx/v8	Muscle_Skeletal	G	3.84094e-06	-0.141054	4.93991e-50	NUP85
17:73318398:A:G	GTEx/v8	Brain_Nucleus_accumbens_basal_ganglia	G	3.84957e-06	-0.321979	4.35155e-21	NUP85
17:73318398:A:G	eQTLcatalogue	Lepik_2017_ge_blood	A	3.89411e-06	0.0530771	0.0194706	MIF4GD
7:135498686:A:G	eQTLGen	eQTLGen_cis_eQTLs	G	3.9575e-06	4.6137	0.0114119	MTPN
16:77383780:C:T	GTEx/v8	Brain_Hypothalamus	T	4.08474e-06	-0.45829	3.12483e-12	ADAMTS18
17:73318398:A:G	GTEx/v8	Esophagus_Gastroesophageal_Junction	G	4.10953e-06	0.134045	4.64941e-18	MRPS7
17:73312171:A:AT	GTEx/v8	Lung	AT	4.27722e-06	0.166132	4.5676e-05	MIF4GD
17:73394449:A:C	GTEx/v8	Skin_Sun_Exposed_Lower_leg	C	4.39076e-06	0.158627	2.31633e-37	MRPS7
11:75879595:C:T	GTEx/v8	Adrenal_Gland	T	4.4404e-06	0.244763	0.00263138	WNT11
11:75879798:C:G	GTEx/v8	Adrenal_Gland	G	4.4404e-06	0.244763	0.00263138	WNT11
17:73318398:A:G	DICE	T_CD4_TH2	G	4.50772e-06	-0.66438	0.049	NUP85
3:148618975:G:T	GTEx/v8	Skin_Sun_Exposed_Lower_leg	T	4.52284e-06	-0.143951	1.51225e-05	CPA3
17:73394449:A:C	GTEx/v8	Muscle_Skeletal	C	4.54831e-06	-0.140037	4.93991e-50	NUP85
17:73318398:A:G	GTEx/v8	Adipose_Subcutaneous	G	4.56328e-06	0.13941	6.12399e-05	MIF4GD
17:73394449:A:C	GTEx/v8	Lung	C	4.57812e-06	0.1627	4.5676e-05	MIF4GD
17:73397985:C:G	GTEx/v8	Lung	G	4.57812e-06	0.1627	4.5676e-05	MIF4GD
17:73318398:A:G	GTEx/v8	Esophagus_Mucosa	G	4.61763e-06	0.127641	3.35409e-41	MRPS7
3:148616665:A:G	GTEx/v8	Skin_Sun_Exposed_Lower_leg	G	4.67795e-06	-0.144198	1.51225e-05	CPA3
17:73401041:G:GT	eQTLcatalogue	CEDAR_neutrophil_CD15	G	4.77639e-06	0.102517	0.0238819	GRB2
17:73318398:A:G	eQTLcatalogue	Alasoo_2018_ge_macrophage_IFNg	A	4.93032e-06	0.198195	0.0246516	MIF4GD
17:73318398:A:G	DICE	Monocyte_classical	G	4.96034e-06	0.674567	0.049	MIF4GD
17:73311171:C:CT	eQTLcatalogue	Alasoo_2018_ge_macrophage_naive	C	5.09061e-06	0.101957	0.025453	GRB2
17:73312171:A:AT	GTEx/v8	Muscle_Skeletal	AT	5.17253e-06	-0.139937	4.93991e-50	NUP85
17:73312171:A:AT	GTEx/v8	Stomach	AT	5.31043e-06	0.16344	3.46137e-21	MRPS7
17:73318398:A:G	GTEx/v8	Thyroid	G	5.53289e-06	0.107088	1.22831e-14	MYO15B
17:73394449:A:C	GTEx/v8	Stomach	C	5.64328e-06	0.163257	3.46137e-21	MRPS7
17:73397985:C:G	GTEx/v8	Stomach	G	5.64328e-06	0.163257	3.46137e-21	MRPS7
11:75879798:C:G	eQTLcatalogue	Lepik_2017_ge_blood	C	5.65356e-06	0.18278	0.0282678	WNT11
17:73397985:C:G	GTEx/v8	Skin_Sun_Exposed_Lower_leg	G	5.6558e-06	0.115271	4.42147e-07	GRB2
17:73318398:A:G	DICE	T_CD4_naive	G	5.74558e-06	-0.650896	0.049	NUP85
17:73318398:A:G	GTEx/v8	Skin_Not_Sun_Exposed_Suprapubic	G	5.81736e-06	-0.127406	2.60875e-10	GGA3
11:75878557:G:T	GTEx/v8	Adrenal_Gland	T	5.82279e-06	0.24307	0.00263138	WNT11
11:75878801:C:T	GTEx/v8	Adrenal_Gland	T	5.82279e-06	0.24307	0.00263138	WNT11
5:10205917:G:GTTATTA	eQTLcatalogue	Fairfax_2014_LPS24	G	5.84987e-06	-0.186551	0.0292493	2021-03-06
17:73394449:A:C	GTEx/v8	Esophagus_Muscularis	C	5.87313e-06	-0.225799	7.63109e-59	NUP85
17:73397985:C:G	GTEx/v8	Esophagus_Muscularis	G	5.87313e-06	-0.225799	7.63109e-59	NUP85
17:73394449:A:C	GTEx/v8	Skin_Sun_Exposed_Lower_leg	C	5.90131e-06	0.115117	4.42147e-07	GRB2
17:73318398:A:G	DICE	Monocyte_classical	G	6.04021e-06	0.671698	0.049	SLC25A19
11:75878801:C:T	eQTLcatalogue	Lepik_2017_ge_blood	C	6.19348e-06	0.181801	0.0309674	WNT11
11:75879595:C:T	eQTLcatalogue	Lepik_2017_ge_blood	C	6.19348e-06	0.181801	0.0309674	WNT11
14:52399493:A:G	GTEx/v8	Testis	G	6.25251e-06	0.207388	7.86021e-16	RP11-463J10.2
17:73318398:A:G	GTEx/v8	Muscle_Skeletal	G	6.45074e-06	-0.185173	1.34441e-22	LLGL2
3:148618975:G:T	GTEx/v8	Lung	T	6.49207e-06	-0.178104	0.000127869	AGTR1
17:73312171:A:AT	GTEx/v8	Muscle_Skeletal	AT	6.57422e-06	-0.118547	4.78486e-05	SLC25A19
17:73397985:C:G	DICE	B_cell_naive	G	6.73397e-06	0.742235	0.049	RP11-649A18.12
17:73318398:A:G	eQTLcatalogue	TwinsUK_ge_blood	A	6.97239e-06	0.0727902	0.0348619	MRPS7
17:73312171:A:AT	GTEx/v8	Vagina	AT	7.05241e-06	0.274091	0.000871393	TSEN54
17:73318398:A:G	GTEx/v8	Liver	G	7.08422e-06	-0.42092	1.96261e-18	NUP85
17:73394449:A:C	GTEx/v8	Vagina	C	7.11258e-06	0.273143	0.000871393	TSEN54
17:73397985:C:G	GTEx/v8	Vagina	G	7.11258e-06	0.273143	0.000871393	TSEN54
17:73318398:A:G	GTEx/v8	Cells_EBV-transformed_lymphocytes	G	7.33875e-06	0.281872	1.97916e-12	MRPS7
2:228834157:A:AAAAAT	GTEx/v8	Testis	AAAAAT	7.39174e-06	-0.284824	0.000380096	SPHKAP
3:148619099:A:G	GTEx/v8	Lung	G	7.59379e-06	-0.177246	0.000127869	AGTR1
3:148619595:C:T	GTEx/v8	Lung	T	7.59379e-06	-0.177246	0.000127869	AGTR1
3:148620710:T:TAA	GTEx/v8	Lung	TAA	7.59379e-06	-0.177246	0.000127869	AGTR1
3:148620881:A:G	GTEx/v8	Lung	G	7.59379e-06	-0.177246	0.000127869	AGTR1
3:148621041:A:C	GTEx/v8	Lung	C	7.59379e-06	-0.177246	0.000127869	AGTR1
3:148621162:A:T	GTEx/v8	Lung	T	7.59379e-06	-0.177246	0.000127869	AGTR1
3:148621388:C:T	GTEx/v8	Lung	T	7.59379e-06	-0.177246	0.000127869	AGTR1
3:148621419:C:CA	GTEx/v8	Lung	CA	7.59379e-06	-0.177246	0.000127869	AGTR1
3:148616665:A:G	GTEx/v8	Lung	G	7.73173e-06	-0.176951	0.000127869	AGTR1
17:73394449:A:C	BIOSQTL	BIOS_eQTL_geneLevel	A	7.77819e-06	4.47133	0.00536038	MYO15B
17:73397985:C:G	BIOSQTL	BIOS_eQTL_geneLevel	C	8.15781e-06	4.46111	0.0056072	MYO15B
3:148622497:A:G	GTEx/v8	Lung	G	8.40878e-06	-0.177041	0.000127869	AGTR1
17:73312171:A:AT	GTEx/v8	Esophagus_Muscularis	AT	8.99462e-06	-0.221724	7.63109e-59	NUP85
17:73397985:C:G	eQTLcatalogue	CEDAR_T-cell_CD8	C	9.19042e-06	-0.0506991	0.0459521	SLC25A19
17:73394449:A:C	eQTLcatalogue	CEDAR_T-cell_CD8	A	9.34771e-06	-0.0506717	0.0467386	SLC25A19
17:73318398:A:G	GTEx/v8	Esophagus_Gastroesophageal_Junction	G	9.44187e-06	-0.187774	0.000880801	GGA3
17:73394449:A:C	GTEx/v8	Heart_Left_Ventricle	C	9.71265e-06	0.129767	6.01406e-32	MRPS7
17:73397985:C:G	GTEx/v8	Heart_Left_Ventricle	G	9.71265e-06	0.129767	6.01406e-32	MRPS7
17:73311171:C:CT	eQTLcatalogue	Fairfax_2014_IFN24	C	9.92518e-06	0.107035	0.0496259	GRB2
17:73318398:A:G	eQTLcatalogue	Fairfax_2014_naive	A	9.99e-06	0.042347	0.04995	NUP85
17:73397985:C:G	eQTLGen	eQTLGen_cis_eQTLs	C	1.0092e-05	4.4153	0.0283904	KCTD2
3:148618086:C:T	GTEx/v8	Lung	T	1.01522e-05	-0.175355	0.000127869	AGTR1
3:148618176:G:T	GTEx/v8	Lung	T	1.01522e-05	-0.175355	0.000127869	AGTR1
3:148618346:G:T	GTEx/v8	Lung	T	1.01522e-05	-0.175355	0.000127869	AGTR1
17:73318398:A:G	GTEx/v8	Thyroid	G	1.01616e-05	-0.121616	1.49392e-16	NT5C
3:148617875:A:G	GTEx/v8	Lung	G	1.06621e-05	-0.174219	0.000127869	AGTR1
3:148617960:C:T	GTEx/v8	Lung	T	1.06621e-05	-0.174219	0.000127869	AGTR1
17:73312171:A:AT	GTEx/v8	Skin_Sun_Exposed_Lower_leg	AT	1.06681e-05	0.152453	2.31633e-37	MRPS7
4:166800215:A:G	PsychENCODE	PsychENCODE_eQTLs	G	1.10794e-05	-0.0759965	0.00119706	TLL1
17:73394449:A:C	DICE	T_CD8_naive	C	1.12758e-05	-0.67409	0.049	NUP85
16:77383780:C:T	GTEx/v8	Testis	T	1.21026e-05	-0.18835	2.53336e-57	SYCE1L
17:73312171:A:AT	GTEx/v8	Heart_Left_Ventricle	AT	1.21547e-05	0.127725	6.01406e-32	MRPS7
17:73312171:A:AT	GTEx/v8	Brain_Cerebellum	AT	1.30061e-05	0.321966	2.35663e-20	MRPS7
17:73318398:A:G	GTEx/v8	Brain_Caudate_basal_ganglia	G	1.30967e-05	-0.312775	6.67063e-23	NUP85
17:73394449:A:C	DICE	Monocyte_classical	C	1.31568e-05	0.656365	0.049	MRPS7
17:73397985:C:G	DICE	Monocyte_classical	G	1.44734e-05	0.656076	0.049	MRPS7
16:77383780:C:T	BRAINEAC	THAL	NA	1.47863e-05	4.51372	0.00263679	ADAMTS18
17:73397985:C:G	GTEx/v8	Whole_Blood	G	1.52011e-05	0.259946	5.18766e-07	RP11-649A18.12
16:77383780:C:T	GTEx/v8	Brain_Caudate_basal_ganglia	T	1.5607e-05	-0.447363	2.98238e-26	ADAMTS18
17:73394449:A:C	GTEx/v8	Artery_Tibial	C	1.56768e-05	0.113429	6.0175e-19	MRPS7
17:73397985:C:G	GTEx/v8	Artery_Tibial	G	1.56768e-05	0.113429	6.0175e-19	MRPS7
17:73312171:A:AT	DICE	Monocyte_classical	AT	1.57805e-05	0.655804	0.049	MRPS7
17:73318398:A:G	DICE	T_CD4_memory_TREG	G	1.66404e-05	-0.628306	0.049	NUP85
17:73312171:A:AT	DICE	T_CD8_naive	AT	1.7373e-05	-0.666058	0.049	NUP85
17:73394449:A:C	GTEx/v8	Whole_Blood	C	1.748e-05	0.258054	5.18766e-07	RP11-649A18.12
17:73397985:C:G	DICE	T_CD8_naive	G	1.77563e-05	-0.663	0.049	NUP85
17:73312171:A:AT	GTEx/v8	Artery_Tibial	AT	1.78821e-05	0.114245	6.0175e-19	MRPS7
17:73318398:A:G	GTEx/v8	Heart_Atrial_Appendage	G	1.79291e-05	-0.173089	7.9348e-08	GGA3
17:73312171:A:AT	GTEx/v8	Cells_Cultured_fibroblasts	AT	1.80054e-05	0.0924151	2.6834e-33	MRPS7
17:73397985:C:G	GTEx/v8	Nerve_Tibial	G	1.95552e-05	0.140553	5.28625e-09	MIF4GD
17:73312171:A:AT	GTEx/v8	Lung	AT	1.96641e-05	-0.218755	1.81641e-51	NUP85
17:73318398:A:G	GTEx/v8	Skin_Sun_Exposed_Lower_leg	G	1.99336e-05	-0.160167	1.01304e-29	NUP85
17:73394449:A:C	GTEx/v8	Nerve_Tibial	C	2.05222e-05	0.140303	5.28625e-09	MIF4GD
2:47363577:A:G	GTEx/v8	Skin_Not_Sun_Exposed_Suprapubic	G	2.11132e-05	-0.346376	0.000320759	C2orf61
17:73397985:C:G	GTEx/v8	Skin_Sun_Exposed_Lower_leg	G	2.11694e-05	0.118574	2.86177e-07	MIF4GD
16:77383780:C:T	GTEx/v8	Whole_Blood	T	2.19237e-05	-0.206758	6.99935e-56	SYCE1L
16:77383780:C:T	GTEx/v8	Brain_Putamen_basal_ganglia	T	2.26206e-05	-0.531264	4.07709e-26	ADAMTS18
17:73318398:A:G	GTEx/v8	Colon_Sigmoid	G	2.27293e-05	-0.160543	0.0023796	GGA3
17:73318398:A:G	GTEx/v8	Prostate	G	2.285e-05	0.211708	1.34047e-09	MRPS7
11:75879595:C:T	GTEx/v8	Colon_Transverse	T	2.31294e-05	-0.243006	2.64657e-05	RP11-619A14.3
11:75879798:C:G	GTEx/v8	Colon_Transverse	G	2.31294e-05	-0.243006	2.64657e-05	RP11-619A14.3
17:73312171:A:AT	GTEx/v8	Prostate	AT	2.46387e-05	0.375459	0.00044357	RP11-649A18.12
17:73312171:A:AT	GTEx/v8	Nerve_Tibial	AT	2.50073e-05	0.138447	5.28625e-09	MIF4GD
17:73394449:A:C	DICE	T_CD4_TH2	C	2.52383e-05	-0.663472	0.049	NUP85
17:73318398:A:G	DICE	T_CD4_TFH	G	2.70812e-05	-0.615525	0.049	NUP85
11:75878557:G:T	GTEx/v8	Colon_Transverse	T	2.80012e-05	-0.241778	2.64657e-05	RP11-619A14.3
11:75878801:C:T	GTEx/v8	Colon_Transverse	T	2.80012e-05	-0.241778	2.64657e-05	RP11-619A14.3
17:73312171:A:AT	GTEx/v8	Muscle_Skeletal	AT	2.84617e-05	0.0713034	1.50461e-25	MRPS7
17:73394449:A:C	GTEx/v8	Skin_Sun_Exposed_Lower_leg	C	2.9288e-05	0.116634	2.86177e-07	MIF4GD
17:73312171:A:AT	GTEx/v8	Small_Intestine_Terminal_Ileum	AT	2.93277e-05	0.350715	7.2693e-08	RP11-649A18.12
17:73394449:A:C	GTEx/v8	Cells_Cultured_fibroblasts	C	3.01764e-05	0.0898168	2.6834e-33	MRPS7
17:73397985:C:G	GTEx/v8	Cells_Cultured_fibroblasts	G	3.3794e-05	0.0891783	2.6834e-33	MRPS7
3:36334400:A:T	GTEx/v8	Brain_Cerebellar_Hemisphere	T	3.53786e-05	0.471511	5.36635e-10	STAC
17:73318398:A:G	GTEx/v8	Artery_Tibial	G	3.67293e-05	-0.16646	3.55201e-20	LLGL2
17:73312171:A:AT	GTEx/v8	Skin_Sun_Exposed_Lower_leg	AT	3.76979e-05	0.11522	2.86177e-07	MIF4GD
17:73318398:A:G	GTEx/v8	Stomach	G	3.88392e-05	-0.145341	8.42426e-09	GGA3
17:73312171:A:AT	DICE	Monocyte_classical	AT	3.95668e-05	0.682979	0.049	SLC25A19
17:73318398:A:G	GTEx/v8	Skin_Sun_Exposed_Lower_leg	G	4.07788e-05	0.102912	2.86177e-07	MIF4GD
17:73312171:A:AT	GTEx/v8	Heart_Atrial_Appendage	AT	4.09497e-05	0.117031	1.91388e-34	MRPS7
16:77383780:C:T	BRAINEAC	TCTX	NA	4.25752e-05	4.25365	0.00526355	ADAMTS18
17:73394449:A:C	GTEx/v8	Brain_Cerebellum	C	4.2899e-05	0.304969	2.35663e-20	MRPS7
17:73397985:C:G	GTEx/v8	Brain_Cerebellum	G	4.2899e-05	0.304969	2.35663e-20	MRPS7
17:73312171:A:AT	GTEx/v8	Brain_Cerebellar_Hemisphere	AT	4.31789e-05	0.264795	8.444e-19	MRPS7
17:73394449:A:C	GTEx/v8	Lung	C	4.38651e-05	0.0959011	0.0136998	GRB2
17:73397985:C:G	GTEx/v8	Lung	G	4.38651e-05	0.0959011	0.0136998	GRB2
17:73397985:C:G	DICE	T_CD4_TH2	G	4.38819e-05	-0.648003	0.049	NUP85
17:73397985:C:G	GTEx/v8	Esophagus_Mucosa	G	4.41098e-05	-0.197512	3.91763e-46	NUP85
17:73318398:A:G	GTEx/v8	Muscle_Skeletal	G	4.44435e-05	-0.097712	4.78486e-05	SLC25A19
17:73394449:A:C	GTEx/v8	Esophagus_Mucosa	C	4.53014e-05	-0.197374	3.91763e-46	NUP85
17:73394449:A:C	DICE	Monocyte_classical	C	4.63439e-05	0.672465	0.049	SLC25A19
17:73318398:A:G	GTEx/v8	Skin_Sun_Exposed_Lower_leg	G	4.64658e-05	0.0880872	2.67125e-18	MYO15B
17:73397985:C:G	GTEx/v8	Esophagus_Mucosa	G	4.68123e-05	-0.156403	0.0205823	CASKIN2
17:73312171:A:AT	GTEx/v8	Esophagus_Mucosa	AT	4.83749e-05	-0.155352	0.0205823	CASKIN2
17:73312171:A:AT	GTEx/v8	Esophagus_Muscularis	AT	4.85779e-05	0.124392	5.08922e-25	MRPS7
17:73394449:A:C	GTEx/v8	Heart_Atrial_Appendage	C	4.88474e-05	0.117144	1.91388e-34	MRPS7
17:73397985:C:G	GTEx/v8	Heart_Atrial_Appendage	G	4.88474e-05	0.117144	1.91388e-34	MRPS7
17:73318398:A:G	DICE	B_cell_naive	G	5.05621e-05	-0.581036	0.049	NUP85
17:73312171:A:AT	DICE	T_CD4_TH2	AT	5.07415e-05	-0.645458	0.049	NUP85
17:73312171:A:AT	GTEx/v8	Thyroid	AT	5.08365e-05	0.132706	2.44551e-08	MIF4GD
17:73394449:A:C	GTEx/v8	Lung	C	5.40438e-05	-0.203461	1.81641e-51	NUP85
17:73397985:C:G	GTEx/v8	Lung	G	5.40438e-05	-0.203461	1.81641e-51	NUP85
17:73318398:A:G	GTEx/v8	Whole_Blood	G	5.46768e-05	0.217756	5.18766e-07	RP11-649A18.12
16:77383780:C:T	GTEx/v8	Whole_Blood	T	5.77152e-05	0.0643739	3.16413e-15	MON1B
17:73312171:A:AT	GTEx/v8	Esophagus_Mucosa	AT	5.85025e-05	-0.19343	3.91763e-46	NUP85
16:77383780:C:T	GTEx/v8	Skin_Sun_Exposed_Lower_leg	T	5.95427e-05	-0.171764	7.35148e-49	SYCE1L
17:73312171:A:AT	GTEx/v8	Breast_Mammary_Tissue	AT	5.97367e-05	-0.198304	7.55442e-17	GGA3
3:148617875:A:G	DICE	T_CD4_naive	G	5.98902e-05	0.564023	0.049	RP11-278L15.3
3:148617960:C:T	DICE	T_CD4_naive	T	5.98902e-05	0.564023	0.049	RP11-278L15.3
3:148618086:C:T	DICE	T_CD4_naive	T	5.98902e-05	0.564023	0.049	RP11-278L15.3
3:148618176:G:T	DICE	T_CD4_naive	T	5.98902e-05	0.564023	0.049	RP11-278L15.3
3:148618254:A:G	DICE	T_CD4_naive	G	5.98902e-05	0.564023	0.049	RP11-278L15.3
3:148618346:G:T	DICE	T_CD4_naive	T	5.98902e-05	0.564023	0.049	RP11-278L15.3
17:73394449:A:C	GTEx/v8	Lung	C	6.02517e-05	0.157329	4.06462e-06	KIAA0195
17:73397985:C:G	GTEx/v8	Lung	G	6.02517e-05	0.157329	4.06462e-06	KIAA0195
17:73397985:C:G	DICE	Monocyte_classical	G	6.05967e-05	0.665598	0.049	SLC25A19
17:73394449:A:C	GTEx/v8	Esophagus_Mucosa	C	6.36558e-05	-0.153804	0.0205823	CASKIN2
17:73318398:A:G	DICE	B_cell_naive	G	6.57362e-05	0.603073	0.049	RP11-649A18.12
17:73394449:A:C	GTEx/v8	Esophagus_Muscularis	C	6.7772e-05	0.121852	5.08922e-25	MRPS7
17:73397985:C:G	GTEx/v8	Esophagus_Muscularis	G	6.7772e-05	0.121852	5.08922e-25	MRPS7
17:73312171:A:AT	GTEx/v8	Whole_Blood	AT	6.88396e-05	0.24234	5.18766e-07	RP11-649A18.12
11:75878557:G:T	BIOSQTL	BIOS_eQTL_geneLevel	G	6.96143e-05	3.97769	0.0391057	UVRAG
11:75879798:C:G	BIOSQTL	BIOS_eQTL_geneLevel	C	6.97902e-05	3.97711	0.0391764	UVRAG
17:73318398:A:G	GTEx/v8	Esophagus_Mucosa	G	7.04081e-05	-0.102245	6.96056e-10	NT5C
11:75879595:C:T	BIOSQTL	BIOS_eQTL_geneLevel	C	7.39518e-05	3.96336	0.0411767	UVRAG
17:73394449:A:C	GTEx/v8	Whole_Blood	C	7.53749e-05	-0.151324	2.92199e-97	MYO15B
17:73394449:A:C	DICE	T_CD4_TH17	C	7.7373e-05	-0.610326	0.049	NUP85
17:73397985:C:G	GTEx/v8	Muscle_Skeletal	G	7.78237e-05	0.0669992	1.50461e-25	MRPS7
17:73397985:C:G	GTEx/v8	Whole_Blood	G	7.79548e-05	-0.151058	2.92199e-97	MYO15B
17:73394449:A:C	DICE	T_CD4_TH1	C	8.06579e-05	-0.699246	0.049	NUP85
11:75878801:C:T	BIOSQTL	BIOS_eQTL_geneLevel	C	8.18902e-05	3.93897	0.0448714	UVRAG
17:73318398:A:G	BIOSQTL	BIOS_eQTL_geneLevel	A	8.73806e-05	-3.92302	0.0474962	SLC16A5
17:73394449:A:C	GTEx/v8	Muscle_Skeletal	C	8.8428e-05	0.0665045	1.50461e-25	MRPS7
17:73397985:C:G	DICE	T_CD4_TH1	G	9.06385e-05	-0.699052	0.049	NUP85
17:73394449:A:C	GTEx/v8	Thyroid	C	9.18536e-05	0.129145	2.44551e-08	MIF4GD
17:73397985:C:G	GTEx/v8	Thyroid	G	9.18536e-05	0.129145	2.44551e-08	MIF4GD
17:73312171:A:AT	GTEx/v8	Lung	AT	9.60854e-05	0.155787	4.06462e-06	KIAA0195
17:73394449:A:C	GTEx/v8	Esophagus_Muscularis	C	9.79686e-05	-0.224186	6.54891e-27	LLGL2
17:73397985:C:G	GTEx/v8	Esophagus_Muscularis	G	9.79686e-05	-0.224186	6.54891e-27	LLGL2
17:73397985:C:G	GTEx/v8	Whole_Blood	G	0.000103309	0.0672746	2.44276e-05	GRB2
17:73318398:A:G	GTEx/v8	Esophagus_Mucosa	G	0.00010485	-0.0988307	0.00224089	LLGL2
17:73318398:A:G	GTEx/v8	Adipose_Subcutaneous	G	0.000106087	0.100538	0.00222829	GRB2
17:73318398:A:G	GTEx/v8	Skin_Not_Sun_Exposed_Suprapubic	G	0.000106236	0.0919897	0.0144202	GRB2
17:73318398:A:G	GTEx/v8	Thyroid	G	0.000123662	-0.102744	5.77144e-12	LLGL2
17:73318398:A:G	GTEx/v8	Thyroid	G	0.000125525	0.112779	2.44551e-08	MIF4GD
16:77383780:C:T	BRAINEAC	aveALL	NA	0.000135724	3.93795	0.0373677	ADAMTS18
16:77383780:C:T	BRAINEAC	FCTX	NA	0.000135724	3.93795	0.0373677	ADAMTS18
17:73394449:A:C	GTEx/v8	Muscle_Skeletal	C	0.000140752	-0.17152	1.34441e-22	LLGL2
17:73397985:C:G	GTEx/v8	Muscle_Skeletal	G	0.00014319	-0.171281	1.34441e-22	LLGL2
17:73394449:A:C	GTEx/v8	Esophagus_Mucosa	C	0.00014968	-0.108006	0.00224089	LLGL2
17:73397985:C:G	GTEx/v8	Esophagus_Mucosa	G	0.000175635	-0.106804	0.00224089	LLGL2
17:73394449:A:C	GTEx/v8	Nerve_Tibial	C	0.00018068	-0.179983	2.63814e-52	NUP85
17:73318398:A:G	eQTLGen	eQTLGen_cis_eQTLs	A	3.27170000000001e-310	-40.7134	0	MRPS7
14:52399493:A:G	CMC	CMC_SVA_cis	A	NA	1	0.049	ERO1L
16:77383780:C:T	CMC	CMC_SVA_cis	C	NA	1	0.009	ADAMTS18
16:77383780:C:T	CMC	CMC_NoSVA_cis	C	NA	1	0.009	ADAMTS18
16:77383780:C:T	CMC	CMC_NoSVA_cis	C	NA	1	0.009	ADAMTS18
17:73312171:A:AT	CMC	CMC_SVA_cis	A	NA	1	0.049	LLGL2
17:73318398:A:G	CMC	CMC_SVA_cis	A	NA	1	0.009	NUP85
17:73318398:A:G	CMC	CMC_SVA_cis	A	NA	1	0.049	LLGL2
17:73318398:A:G	CMC	CMC_SVA_cis	G	NA	1	0.009	MRPS7
17:73318398:A:G	CMC	CMC_SVA_cis	A	NA	1	0.009	GRB2
17:73318398:A:G	CMC	CMC_NoSVA_cis	A	NA	1	0.009	NUP85
17:73318398:A:G	CMC	CMC_NoSVA_cis	A	NA	1	0.009	NUP85
17:73318398:A:G	CMC	CMC_SVA_cis	A	NA	1	0.049	EXOC7
17:73394449:A:C	CMC	CMC_SVA_cis	A	NA	1	0.049	LLGL2
17:73397985:C:G	CMC	CMC_SVA_cis	C	NA	1	0.049	LLGL2
4:166797660:C:T	CMC	CMC_SVA_cis	C	NA	1	0.009	TLL1
4:166800215:A:G	CMC	CMC_SVA_cis	A	NA	1	0.009	TLL1
5:121252616:G:T	CMC	CMC_SVA_cis	T	NA	1	0.049	LOX
